# Supplementary material for: Synthesis and characterization of Cs2Zn4V4O15—a new vanadate in the Cs–Zn–V–O quaternary system
Source: Royal Society of Chemistry journal article supplement (doi:10.1039/d3nj01020a), 2023-01-01
Supplement: d3nj01020a1.pdf [file d3nj01020a1.pdf]

# Supporting Information

## **Synthesis and Characterization of $\text{Cs}_2\text{Zn}_4\text{V}_4\text{O}_{15}$ - a New Vanadate in the Cs-Zn-V-O Quaternary System**

Qiuyuan Feng, Jianyi Zuo, and Hong Du \*

*College of Chemistry and Chemical Engineering, Xinjiang Normal University, Urumqi, Xinjiang  
830054, P. R. China.*

\*E-mails: 175790509@qq.com (Hong Du);

## Content

### CCDC number: 2236458

**Table S1.** Atomic coordinates and equivalent isotropic displacement parameters and bond valence sum (BVS) calculations for  $\text{Cs}_2\text{Zn}_4\text{V}_4\text{O}_{15}$ .  $U(\text{eq})$  is defined as one third of the trace of the orthogonalized  $U_{ij}$  tensor.

**Table S2.** Optimized atomic coordinates and equivalent isotropic displacement parameters and bond valence sum (BVS)\* calculations for  $\text{Cs}_2\text{Zn}_4\text{V}_4\text{O}_{15}$ .  $U(\text{eq})$  is defined as one third of the trace of the orthogonalized  $U_{ij}$  tensor.

**Table S3.** The selected bond lengths and angles of  $\text{Cs}_2\text{Zn}_4\text{V}_4\text{O}_{15}$

**Table S4.** Vanadate containing Cs and Zn ions. Note The following compounds are all from ICSD and the anionic group is the  $[\text{VO}_x]$  group, except for other disordered structures, fluorides, and structures containing crystalline water, all cesium vanadate and zinc vanadate are summarized.

**Figure S1.** PXRD pattern calculated, before melting and after melting for  $\text{Cs}_2\text{Zn}_4\text{V}_4\text{O}_{15}$

**Figure S2.** Energy dispersive X-ray spectroscopy (EDS) analysis for  $\text{Cs}_2\text{Zn}_4\text{V}_4\text{O}_{15}$

**Figure S3.** (a)  $^1[\text{ZnO}_4]_\infty$  chain; (b) The crystal structure of  $\text{Cs}_2\text{Zn}_4\text{V}_4\text{O}_{15}$ ; (c) The V-O-V bond Angle is  $145.4^\circ$  in the  $\text{Cs}_2\text{Zn}_4\text{V}_4\text{O}_{15}$  compound; (d)  $[\text{Nb}_2\text{O}_{11}]$  dimers; (e) The crystal structure of  $\text{CsNbV}_2\text{O}_8$ ; (f) The V-O-V bond Angle is  $151.2^\circ$  in the  $\text{CsNbV}_2\text{O}_8$  compound; (O red; V brown; Cs:green; Zn gray; Nb:blue;)

**Figure S4.** TG/DSC curves of  $\text{Cs}_2\text{Zn}_4\text{V}_4\text{O}_{15}$ .

**Figure S5.** The obtained infrared spectrum of compound  $\text{Cs}_2\text{Zn}_4\text{V}_4\text{O}_{15}$  obtained by DFT calculation.

**Table S1.** Atomic coordinates and equivalent isotropic displacement parameters and bond valence sum (BVS)\* calculations for Cs<sub>2</sub>Zn<sub>4</sub>V<sub>4</sub>O<sub>15</sub>.  $U(\text{eq})$  is defined as one third of the trace of the orthogonalized  $U_{ij}$  tensor.

| Atoms | x/a     | y/b      | z/c     | U(eq) | BVS   |
|-------|---------|----------|---------|-------|-------|
| Cs(1) | 3759(1) | 2560(1)  | 3234(1) | 32(1) | 0.925 |
| Zn(1) | 3386(1) | -2205(1) | 6080(1) | 15(1) | 2.091 |
| Zn(2) | 4188(1) | 2897(1)  | 5429(1) | 16(1) | 2.077 |
| V(1)  | 5962(1) | 7305(1)  | 3065(1) | 16(1) | 4.884 |
| V(2)  | 3701(1) | -2350(1) | 4556(1) | 14(1) | 4.849 |
| O(1)  | 3611(2) | -3840(5) | 5295(1) | 19(1) | 2.020 |
| O(2)  | 6087(2) | 8890(5)  | 3815(1) | 20(1) | 2.054 |
| O(3)  | 3816(2) | 758(5)   | 4685(2) | 27(1) | 1.973 |
| O(4)  | 4574(2) | -3545(6) | 4314(2) | 24(1) | 1.958 |
| O(5)  | 6771(2) | 7959(7)  | 2734(2) | 37(1) | 1.913 |
| O(6)  | 5930(2) | 4200(5)  | 3207(2) | 26(1) | 1.921 |
| O(7)  | 2834(2) | -2941(6) | 3939(2) | 24(1) | 1.958 |
| O(8)  | 5000    | 8297(9)  | 2500    | 41(1) | 2.059 |

(BVS)\*: The bond valence sums were calculated using the formula  $V_i = \sum S_{ij} = \sum \exp[(r_0 - r_{ij})/B]$ , where  $S_{ij}$  is the bond valence associated with bond length  $r_{ij}$ , and  $r_0$  and  $B$  (usually 0.37) are empirically determined parameters.<sup>[1]</sup>

**Table S2.** Optimized atomic coordinates and equivalent isotropic displacement parameters and bond valence sum (BVS)\* calculations for Cs<sub>2</sub>Zn<sub>4</sub>V<sub>4</sub>O<sub>15</sub>.  $U(\text{eq})$  is defined as one third of the trace of the orthogonalized  $U_{ij}$  tensor.

| Atoms | x/a    | y/b     | z/c    | U(eq) | BVS   |
|-------|--------|---------|--------|-------|-------|
| Cs(1) | 3706   | 2462.6  | 3149   | 32.13 | 1.173 |
| Zn(1) | 3391   | -2277.5 | 6081   | 15.23 | 1.681 |
| Zn(2) | 4208.5 | 2922.3  | 5348.2 | 16.47 | 1.653 |
| V(1)  | 5921.5 | 7275.3  | 3076.8 | 16.19 | 4.401 |
| V(2)  | 3671.4 | -2490.3 | 4476.1 | 13.49 | 4.405 |
| O(1)  | 3452.2 | -3878.7 | 5202.5 | 18.79 | 1.736 |
| O(2)  | 6074.6 | 8821.6  | 3848.8 | 20.43 | 1.799 |
| O(3)  | 3872   | 672.1   | 4574.9 | 27.43 | 1.773 |
| O(4)  | 4558.2 | -4035   | 4294.5 | 24.34 | 1.726 |
| O(5)  | 6789.9 | 7712.9  | 2750.1 | 37.03 | 1.789 |
| O(6)  | 5772.6 | 4126.7  | 3194.9 | 26.35 | 1.758 |
| O(7)  | 2831.1 | -2935.8 | 3799.6 | 24.4  | 1.745 |
| O(8)  | 5000   | 8583.6  | 2500   | 40.91 | 1.973 |

(BVS)\*: The bond valence sums were calculated using the formula  $V_i = \sum S_{ij} = \sum \exp[(r_0 - r_{ij})/B]$ , where  $S_{ij}$  is the bond valence associated with bond length  $r_{ij}$ , and  $r_0$  and  $B$  (usually 0.37) are empirically determined parameters.<sup>[1]</sup>

**Table S3.** The selected bond lengths and angles of Cs<sub>2</sub>Zn<sub>4</sub>V<sub>4</sub>O<sub>15</sub>.

|                     |            |                     |            |
|---------------------|------------|---------------------|------------|
| Cs(1)-O(3)          | 3.168(3)   | Zn(1)-O(7)#8        | 1.912(3)   |
| Cs(1)-O(4)#2        | 3.137(3)   | Zn(2)-O(1)#2        | 1.961(3)   |
| Cs(1)-O(5)#3        | 3.081(4)   | Zn(2)-O(2)#6        | 1.976(3)   |
| Cs(1)-O(5)#4        | 3.183(4)   | Zn(2)-O(3)          | 1.917(3)   |
| Cs(1)-O(5)#1        | 3.525(4)   | Zn(2)-O(4)#7        | 1.935(3)   |
| Cs(1)-O(6)          | 3.537(3)   | V(1)-O(2)           | 1.758(3)   |
| Cs(1)-O(6)#1        | 3.278(3)   | V(1)-O(5)           | 1.613(4)   |
| Cs(1)-O(7)          | 3.728(3)   | V(1)-O(6)           | 1.692(3)   |
| Cs(1)-O(7)#2        | 3.320(3)   | V(1)-O(8)           | 1.7855(16) |
| Cs(1)-O(8)#5        | 3.561(3)   | V(2)-O(1)           | 1.773(3)   |
| Zn(1)-O(1)          | 1.959(3)   | V(2)-O(3)           | 1.689(3)   |
| Zn(1)-O(2)#6        | 1.951(3)   | V(2)-O(4)           | 1.689(3)   |
| Zn(1)-O(6)#7        | 1.956(3)   | V(2)-O(7)           | 1.691(3)   |
| O(3)-Cs(1)-O(5)#4   | 108.84(9)  | O(6)-Cs(1)-O(7)     | 131.57(7)  |
| O(3)-Cs(1)-O(5)#1   | 138.98(8)  | O(6)#1-Cs(1)-O(7)   | 136.44(7)  |
| O(3)-Cs(1)-O(6)#1   | 169.85(8)  | O(6)#1-Cs(1)-O(7)#2 | 112.42(8)  |
| O(3)-Cs(1)-O(6)     | 105.38(8)  | O(6)-Cs(1)-O(8)#5   | 62.03(7)   |
| O(3)-Cs(1)-O(7)#2   | 73.70(8)   | O(6)#1-Cs(1)-O(8)#5 | 64.50(7)   |
| O(3)-Cs(1)-O(7)     | 46.57(7)   | O(7)#2-Cs(1)-O(5)#1 | 65.69(8)   |
| O(3)-Cs(1)-O(8)#5   | 108.32(7)  | O(7)#2-Cs(1)-O(6)   | 110.15(7)  |
| O(4)#2-Cs(1)-O(3)   | 65.81(8)   | O(7)#2-Cs(1)-O(7)   | 98.72(8)   |
| O(4)#2-Cs(1)-O(5)#4 | 169.26(9)  | O(7)#2-Cs(1)-O(8)#5 | 172.14(7)  |
| O(4)#2-Cs(1)-O(5)#1 | 82.94(9)   | O(8)#5-Cs(1)-O(7)   | 87.80(7)   |
| O(4)#2-Cs(1)-O(6)#1 | 111.42(8)  | O(2)#6-Zn(1)-O(1)   | 110.55(12) |
| O(4)#2-Cs(1)-O(6)   | 66.57(7)   | O(2)#6-Zn(1)-O(6)#7 | 105.15(12) |
| O(4)#2-Cs(1)-O(7)   | 111.96(8)  | O(6)#7-Zn(1)-O(1)   | 103.03(12) |
| O(4)#2-Cs(1)-O(7)#2 | 49.25(7)   | O(7)#8-Zn(1)-O(1)   | 111.38(13) |
| O(4)#2-Cs(1)-O(8)#5 | 124.12(6)  | O(7)#8-Zn(1)-O(2)#6 | 111.39(13) |
| O(5)#3-Cs(1)-O(3)   | 99.29(9)   | O(7)#8-Zn(1)-O(6)#7 | 114.89(14) |
| O(5)#3-Cs(1)-O(4)#2 | 115.07(9)  | O(1)#2-Zn(2)-O(2)#6 | 111.72(12) |
| O(5)#4-Cs(1)-O(5)#1 | 105.82(11) | O(3)-Zn(2)-O(1)#2   | 111.54(13) |
| O(5)#3-Cs(1)-O(5)#4 | 74.43(8)   | O(3)-Zn(2)-O(2)#6   | 106.18(13) |
| O(5)#3-Cs(1)-O(5)#1 | 69.65(8)   | O(3)-Zn(2)-O(4)#7   | 116.31(14) |
| O(5)#3-Cs(1)-O(6)#1 | 90.72(9)   | O(4)#7-Zn(2)-O(1)#2 | 106.64(13) |
| O(5)#4-Cs(1)-O(6)   | 107.57(8)  | O(4)#7-Zn(2)-O(2)#6 | 104.30(13) |
| O(5)#1-Cs(1)-O(6)   | 83.99(8)   | O(2)-V(1)-O(8)      | 111.19(14) |
| O(5)#4-Cs(1)-O(6)#1 | 72.11(8)   | O(5)-V(1)-O(2)      | 109.42(17) |
| O(5)#3-Cs(1)-O(6)   | 152.73(8)  | O(5)-V(1)-O(6)      | 110.21(18) |
| O(5)#4-Cs(1)-O(7)#2 | 139.88(8)  | O(5)-V(1)-O(8)      | 106.58(15) |
| O(5)#1-Cs(1)-O(7)   | 144.25(8)  | O(6)-V(1)-O(2)      | 108.62(15) |
| O(5)#3-Cs(1)-O(7)   | 74.62(8)   | O(6)-V(1)-O(8)      | 110.80(18) |
| O(5)#4-Cs(1)-O(7)   | 64.50(8)   | O(3)-V(2)-O(1)      | 109.28(15) |
| O(5)#3-Cs(1)-O(7)#2 | 65.82(9)   | O(3)-V(2)-O(7)      | 110.30(15) |

---

|                     |           |                |            |
|---------------------|-----------|----------------|------------|
| O(5)#4-Cs(1)-O(8)#5 | 47.28(7)  | O(4)-V(2)-O(1) | 108.39(14) |
| O(5)#1-Cs(1)-O(8)#5 | 111.17(8) | O(4)-V(2)-O(3) | 110.79(16) |
| O(5)#3-Cs(1)-O(8)#5 | 120.57(7) | O(4)-V(2)-O(7) | 105.81(15) |
| O(6)#1-Cs(1)-O(5)#1 | 46.80(8)  | O(7)-V(2)-O(1) | 112.22(15) |
| O(6)#1-Cs(1)-O(6)   | 65.21(9)  |                |            |

---

Symmetry transformations used to generate equivalent atoms:

|                        |                       |                        |
|------------------------|-----------------------|------------------------|
| #1 $x-1, y, z-1$       | #2 $-x, y-1/2, -z+2$  | #3 $x+1, y, z+1$       |
| #4 $-x+1, y+1/2, -z+2$ | #5 $x, y, z+1$        | #6 $-x+1, y-1/2, -z+2$ |
| #7 $-x, y-1/2, -z+1$   | #8 $-x, y+1/2, -z+2$  | #9 $x-1, y, z$         |
| #10 $x, y, z-1$        | #11 $-x, y+1/2, -z+1$ | #12 $x+1, y, z$        |

**Table S4** Vanadate containing Cs and Zn ions. Note the following compounds are all from ICSD and the anionic group is the  $[\text{VO}_x]$  group, except for other disordered structures, fluorides, and structures containing crystalline water, all cesium vanadate and zinc vanadate are summarized.

| No. | Compounds                                        | Dimension | Basic Units                              | Space group | Ref |
|-----|--------------------------------------------------|-----------|------------------------------------------|-------------|-----|
| 1   | $\text{Cs}_3\text{Mn}_3\text{V}_4\text{O}_{16}$  | 0D        | $[\text{VO}_4]$                          | $P\bar{1}$  | 2   |
| 2   | $\text{Cs}_2\text{LiVO}_4$                       | 0D        | $[\text{VO}_4]$                          | $Cmc2_1$    | 3   |
| 3   | $\text{Cs}_2\text{NaVO}_4$                       | 0D        | $[\text{VO}_4]$                          | $P2_1/m$    | 4   |
| 4   | $\text{Cs}_2(\text{UO}_2)_2\text{V}_2\text{O}_8$ | 0D        | $[\text{VO}_5]$                          | $P2_1/c$    | 5   |
| 5   | $\text{CsSbV}_2\text{O}_8$                       | 0D        | $[\text{VO}_4]$                          | $P2_1/c$    | 6   |
| 6   | $\text{K}_2\text{CsLa}(\text{VO}_4)_2$           | 0D        | $[\text{VO}_4]$                          | $P2_1/m$    | 7   |
| 7   | $\text{CsVO}_3$                                  | 0D        | $[\text{VO}_4]$                          | $P6_3/m$    | 8   |
| 8   | $\text{Cs}_2\text{Sr}(\text{VO}_3)_4$            | 0D        | $[\text{VO}_4]$                          | $P4/mmm$    | 9   |
| 9   | $\text{CsNbV}_2\text{O}_8$                       | 0D        | $[\text{VO}_4] + [\text{V}_2\text{O}_7]$ | $P2_1/m$    | 10  |
| 10  | $\text{CsTaV}_2\text{O}_8$                       | 0D        | $[\text{VO}_4] + [\text{V}_2\text{O}_7]$ | $P2_1/m$    | 10  |
| 11  | $\text{Cs}_2\text{Sr}(\text{VO}_3)_4$            | 0D        | $[\text{V}_4\text{O}_{12}]$              | $P4/nbm$    | 11  |
| 12  | $\text{Cs}_{11}(\text{Ge}_9)_2\text{VO}_4$       | 0D        | $[\text{VO}_4]$                          | $P2_1/c$    | 12  |
| 13  | $\text{Cs}_2\text{CaV}_2\text{O}_7$              | 0D        | $[\text{V}_2\text{O}_7]$                 | $P2_1/c$    | 13  |

|    |                                         |    |                                 |            |    |
|----|-----------------------------------------|----|---------------------------------|------------|----|
| 14 | $\text{CsVO}_3$                         | 1D | $[\text{VO}_4]$                 | $Pbcm$     | 14 |
| 15 | $\text{Cs}_2\text{FeV}_6\text{O}_{16}$  | 2D | $[\text{VO}_4]$                 | $P\bar{1}$ | 15 |
| 16 | $\text{Cs}_2\text{V}_5\text{O}_{13}$    | 2D | $[\text{VO}_4] + [\text{VO}_5]$ | $I4mm$     | 16 |
| 17 | $\text{CsV}_2\text{O}_5$                | 2D | $[\text{VO}_4] + [\text{VO}_5]$ | $P2_1/c$   | 17 |
| 18 | $\text{CsV}_3\text{O}_8$                | 2D | $[\text{VO}_5] + [\text{VO}_6]$ | $P2_1/m$   | 18 |
| 19 | $\text{Cs}(\text{UO}_2)(\text{VO}_3)_3$ | 2D | $[\text{VO}_5]$                 | $P2_1/c$   | 19 |
| 20 | $\text{Cs}_2\text{V}_3\text{O}_8$       | 2D | $[\text{VO}_4] + [\text{VO}_5]$ | $P4bm$     | 20 |
| 21 | $\text{CsCrV}_2\text{O}_7$              | 2D | $[\text{VO}_4]$                 | $P2/c$     | 21 |
| 22 | $\text{Cs}_4\text{V}_8\text{O}_{22}$    | 2D | $[\text{VO}_4] + [\text{VO}_5]$ | $Pca2_1$   | 22 |
| 23 | $\text{Cs}_4\text{Ba}(\text{VO}_3)_6$   | 3D | $[\text{VO}_4]$                 | $R3c$      | 23 |
| 24 | $\text{Zn}_2\text{V}_2\text{O}_7$       | 0D | $[\text{V}_2\text{O}_7]$        | $C2/c$     | 24 |
| 25 | $\text{Zn}_3(\text{VO}_4)_2$            | 0D | $[\text{VO}_4]$                 | $Cmca$     | 25 |
| 26 | $\text{SrZnV}_2\text{O}_7$              | 0D | $[\text{VO}_4]$                 | $P2_1/c$   | 26 |
| 27 | $\text{CuZnV}_2\text{O}_7$              | 0D | $[\text{V}_2\text{O}_7]$        | $C2/c$     | 27 |
| 28 | $\text{Zn}_4\text{V}_2\text{O}_9$       | 0D | $[\text{V}_2\text{O}_7]$        | $P2_1$     | 28 |
| 29 | $\text{BaMgZn}(\text{VO}_4)_2$          | 0D | $[\text{VO}_4]$                 | $I4_1/acd$ | 29 |



|    |                                                     |    |                                 |               |    |
|----|-----------------------------------------------------|----|---------------------------------|---------------|----|
| 30 | $\text{Ca}_5\text{Mg}_3\text{Zn}(\text{VO}_4)_6$    | 0D | $[\text{VO}_4]$                 | $\bar{I}43d$  | 30 |
| 33 | $\text{Zn}_2\text{GaV}_3\text{O}_{11}$              | 0D | $[\text{VO}_4] + [\text{VO}_5]$ | $P\bar{1}$    | 31 |
| 32 | $\text{BaZnV}_2\text{O}_7$                          | 0D | $[\text{V}_2\text{O}_7]$        | $P2_1/c$      | 32 |
| 33 | $\text{Ca}_2\text{NaZn}_2(\text{VO}_4)_3$           | 0D | $[\text{VO}_4]$                 | $Ia\bar{3}d$  | 33 |
| 34 | $\text{Pb}_2\text{BaTeZn}_3\text{V}_2\text{O}_{14}$ | 0D | $[\text{VO}_4]$                 | $P321$        | 34 |
| 35 | $\text{PbBa}_2\text{TeZn}_3\text{V}_2\text{O}_{14}$ | 0D | $[\text{VO}_4]$                 | $P321$        | 34 |
| 36 | $\text{Na}_2\text{Zn}_2\text{Fe}(\text{VO}_4)_3$    | 0D | $[\text{VO}_4]$                 | $C2/c$        | 35 |
| 37 | $\text{Na}_2\text{ZnV}_2\text{O}_7$                 | 0D | $[\text{VO}_4]$                 | $P\bar{4}21m$ | 36 |
| 38 | $\text{Ba}_3\text{Zn}(\text{V}_2\text{O}_7)_2$      | 0D | $[\text{V}_2\text{O}_7]$        | $P2_1/c$      | 37 |
| 39 | $\text{Pb}_3\text{Zn}_3\text{TeV}_2\text{O}_{14}$   | 0D | $[\text{VO}_4]$                 | $P321$        | 38 |
| 40 | $\text{Ca}_8\text{BiZn}(\text{VO}_4)_7$             | 0D | $[\text{VO}_4]$                 | $R3c$         | 39 |
| 41 | $\text{LiCa}_3\text{ZnV}_3\text{O}_{12}$            | 0D | $[\text{VO}_4]$                 | $Ia\bar{3}d$  | 40 |
| 42 | $\text{Ag}_2\text{Zn}_2\text{Fe}(\text{VO}_4)_3$    | 0D | $[\text{VO}_4]$                 | $C2/c$        | 41 |
| 43 | $\text{Ba}_2\text{ZnV}_2\text{O}_8$                 | 0D | $[\text{VO}_4]$                 | $P2_1/c$      | 42 |
| 44 | $\text{AgPb}_2\text{Zn}_2(\text{VO}_4)_3$           | 0D | $[\text{VO}_4]$                 | $Ia\bar{3}d$  | 43 |
| 45 | $\text{Zn}_3\text{Fe}_4(\text{VO}_4)_6$             | 0D | $[\text{VO}_4]$                 | $P\bar{1}$    | 26 |

|    |                                                            |    |                                 |              |    |
|----|------------------------------------------------------------|----|---------------------------------|--------------|----|
| 46 | $\text{Ba}_2\text{Zn}(\text{VO}_4)_2$                      | 0D | $[\text{VO}_4]$                 | $P2_1/c$     | 44 |
| 47 | $\text{Ca}_2\text{AgZn}_2\text{V}_3\text{O}_{12}$          | 0D | $[\text{VO}_4]$                 | $Ia\bar{3}d$ | 45 |
| 48 | $\text{ZnV}_3\text{O}_8$                                   | 1D | $[\text{VO}_4]$                 | $P2_1/m$     | 46 |
| 49 | $\text{FeZn}_2\text{V}_3\text{O}_{11}$                     | 1D | $[\text{VO}_4]$                 | $P\bar{1}$   | 47 |
| 50 | $\text{MgZnV}_2\text{O}_7$                                 | 1D | $[\text{VO}_4] + [\text{VO}_5]$ | $C2/m$       | 48 |
| 51 | $\text{Ca}_2\text{Zn}_2\text{V}_3\text{O}_{10}\text{VO}_4$ | 1D | $[\text{VO}_4] + [\text{VO}_5]$ | $P2_1/c$     | 49 |
| 52 | $\text{PbZnV}_2\text{O}_7$                                 | 1D | $[\text{VO}_4]$                 | $P2_1/c$     | 50 |
| 53 | $\text{ZnV}_2\text{O}_6$                                   | 2D | $[\text{VO}_4]$                 | $C2$         | 51 |
| 54 | $\text{LiZnVO}_4$                                          | 3D | $[\text{VO}_4]$                 | $R\bar{3}$   | 52 |
| 55 | $\text{ZnV}_3\text{O}_8$                                   | 3D | $[\text{VO}_4] + [\text{VO}_5]$ | $Iba2$       | 53 |

---

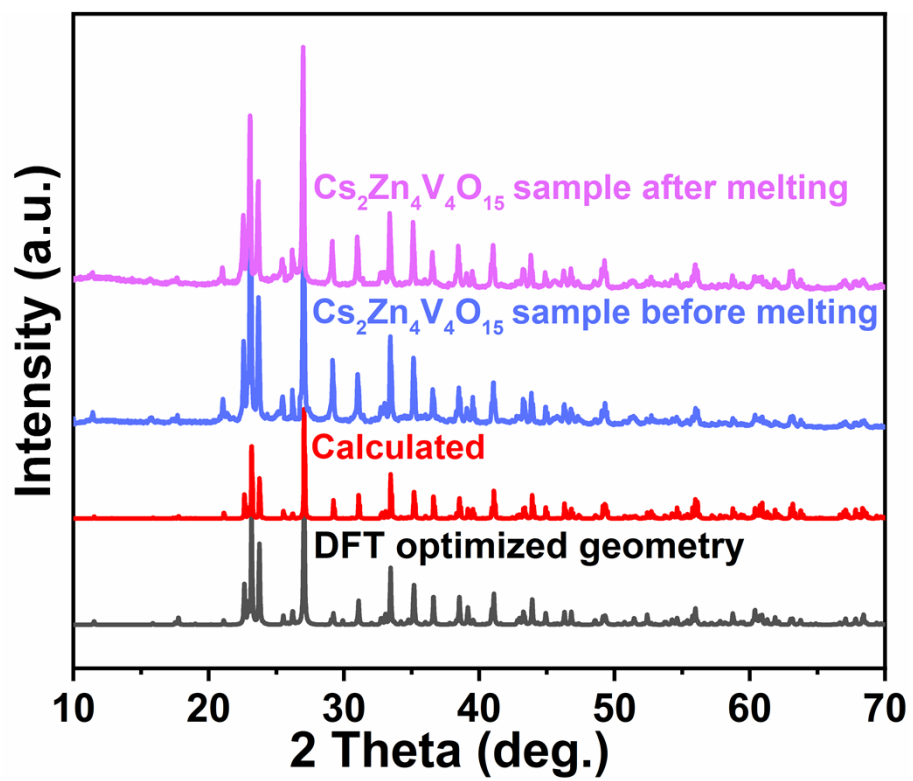

**Figure S1.** PXRD pattern calculated, before melting and after melting for  $\text{Cs}_2\text{Zn}_4\text{V}_4\text{O}_{15}$

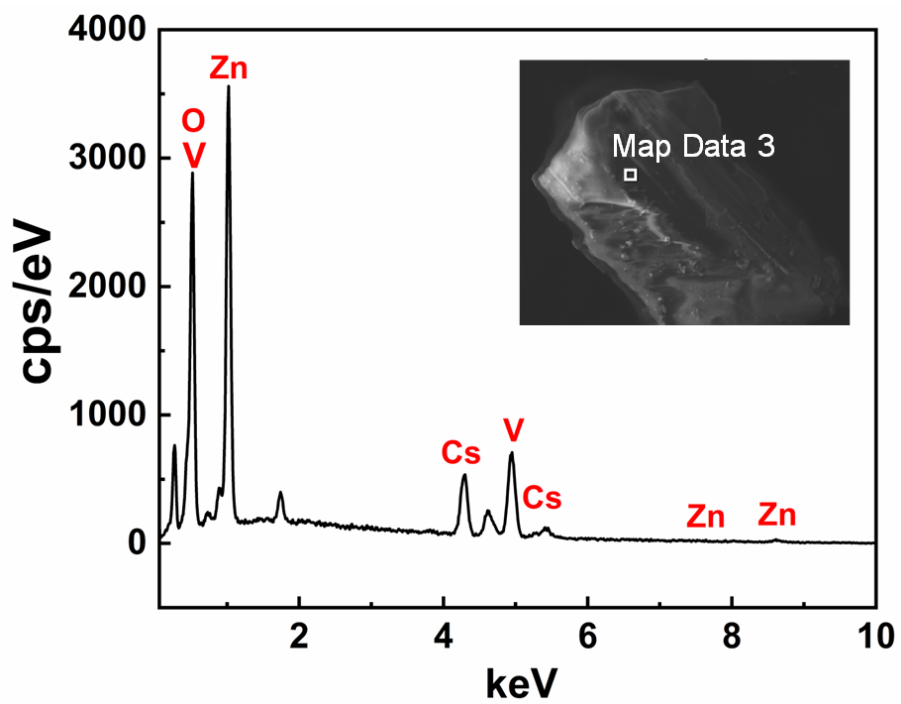

**Figure S2.** Energy dispersive X-ray spectroscopy (EDS) analysis for  $\text{Cs}_2\text{Zn}_4\text{V}_4\text{O}_{15}$ .

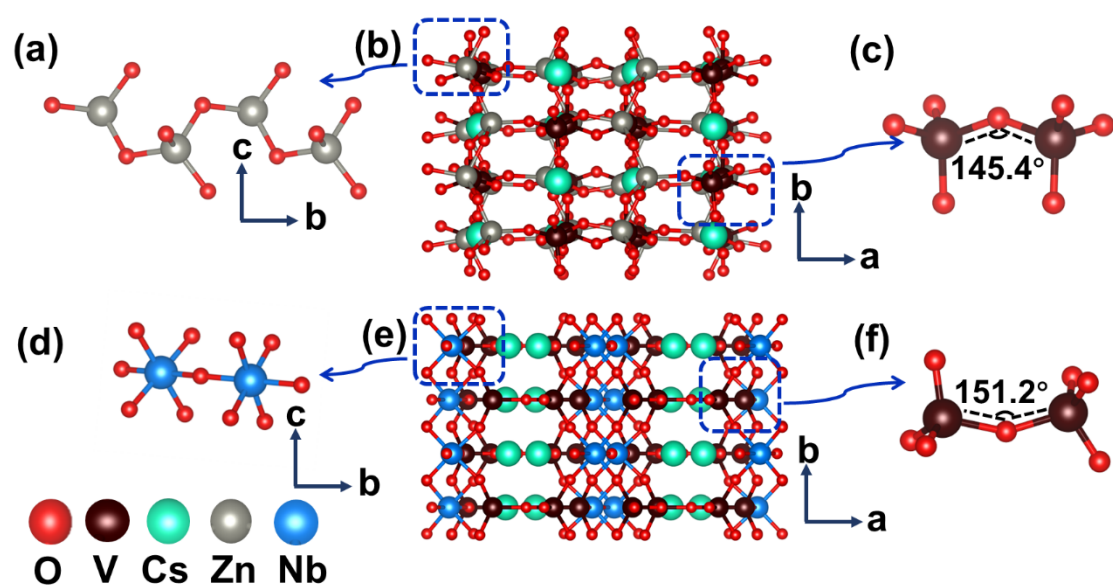

**Figure S3** (a)  $^{1}[\text{ZnO}_4]_{\infty}$  chain; (b) The crystal structure of  $\text{Cs}_2\text{Zn}_4\text{V}_4\text{O}_{15}$ ; (c) The V-O-V bond Angle is  $145.4^\circ$  in the  $\text{Cs}_2\text{Zn}_4\text{V}_4\text{O}_{15}$  compound; (d)  $[\text{Nb}_2\text{O}_{11}]$  dimer; (e) The crystal structure of  $\text{CsNbV}_2\text{O}_8$ ; (f) The V-O-V bond Angle is  $151.2^\circ$  in the  $\text{CsNbV}_2\text{O}_8$  compound; (O red; V brown; Cs:green; Zn gray; Nb:blue;)

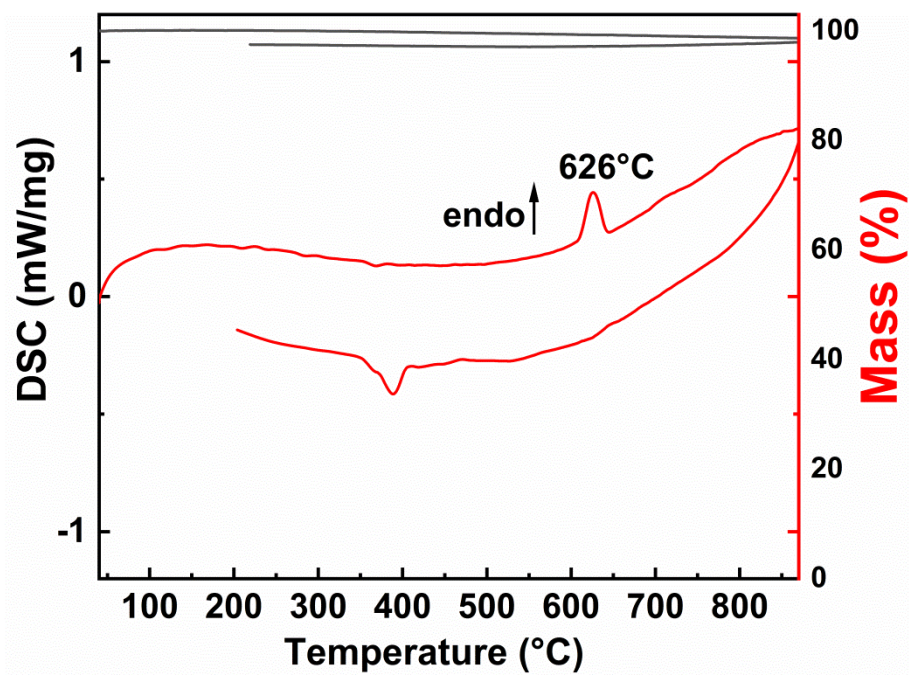

Figure S4. TG/DSC curves of  $\text{Cs}_2\text{Zn}_4\text{V}_4\text{O}_{15}$ .

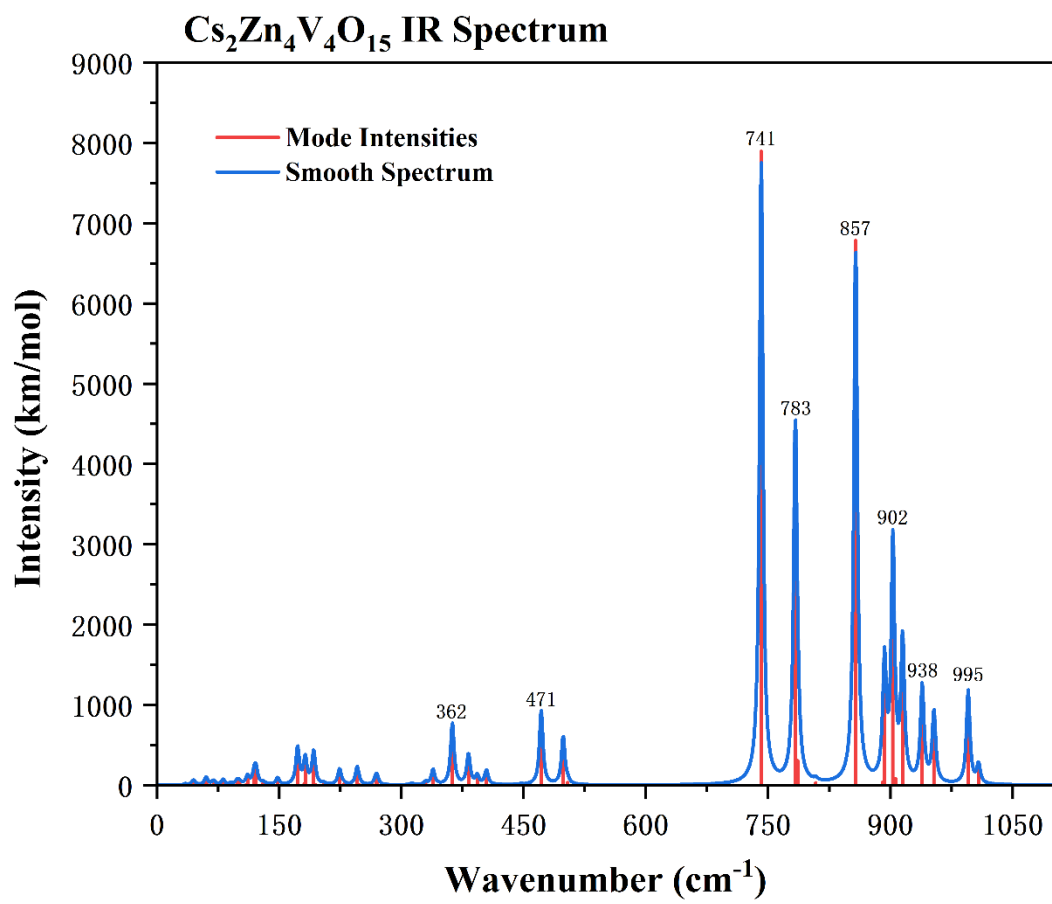

**Figure S5.** The obtained infrared spectrum of compound  $\text{Cs}_2\text{Zn}_4\text{V}_4\text{O}_{15}$  obtained by DFT calculation.

## References

1. N. E. Brese, M. Okeeffe, *Acta. crystallogr. B.* 1991, **47**, 192-197.
2. Y. Le Page, P. Strobel, *Inorg. Chem.* 1982, **21**, 620-623.
3. R. Hoppe, J. Kissel, *Z. Anorg. Allg. Chem.* 1989, **571**, 113-126.
4. J. Kissel, R. Hoppe, *Z. Anorg. Allg. Chem.* 1990, **587**, 29-38.
5. G. J. Richard, *J. Mater. Chem.* 1992, **2**, 161-166.
6. R. áNandini Devi, *J. Chem. Soc. Dalton Trans.* 1998, **18**, 3013-3020.
7. L. Rghioui, L. El Ammari, L. Benerafa, M. Knidiri, A. Lorriaux, F. Wallart, H. Krautscheid, *Can. J. Anal. Sci. Spectros.* 1999, **44**, 89-96.
8. C. Wu, X. X. Jiang, L. Lin, Y. L. Hu, T. H. Wu, Z. S. Lin, [Z. P. Huang](#), [M. G. Humphrey](#), C. Zhang, *Angew. Chem. Int. Ed.* 2021, **133**, 22621-22627.
9. B. V. Slobodin; L. L. Surat, V. G. Zubkov, A. P. Tyutyunnik, I. F. Berger, M. V. Kuznetsov, L. A. Perelyaeva, I. R. Shein, A. L. Ivanovskii, B. V. Shulgin, V. I. Solomonov, G. Svensson, B. Forslund, M. J. Structural, *Phys. Rev. B.* 2005, **72**, 155205.
10. A. K. Paidi, R. N. Devi, K. Vidyasagar, *Dalton. Trans.* 2015, **44**, 17399-17408.
11. V. G. Zubkov, A. P. Tyutyunnik, I. F. Berger, L. L. Surat, B. V. Slobodin, *Neorg. Khim.* 2003, **48**, 2074-2079.
12. V. Hlukhyy, T. F. Faessler, *Angew. Chem. Int. Ed.* 2012, **51**, 4058-4065.
13. V. G. Zubkov, A. P. Tyutyunnik, N. V. Tarakina, I. F. Berger, L. L. Surat, B. V. Slobodin, A. N. Cherepanov, *Solid. State. sci.* 2009, **11**, 726-732.
14. F. C. Hawthorne, C. Calvo, *J. Solid. State. Chem.* 1977, **22**, 157-170.
15. T. M. Smith Pellizzeri, C. D. McMillen, Y. Wen, G. Chumanov, J. W. Eur. Kolis, *J. Inorg. Chem.* 2019, **2019**, 4538-4545.
16. K. Waltersson, *Acta. Crystallogr. B.* 1977, **33**, 784-789.
17. K. Waltersson, B. Forslund, *Acta. Crystallogr. B.* 1977, **33**, 789-793.
18. H. T. Evans Jr, *Inorg. Chem.* 1966, **5**, 967-977.
19. I. Duribreux, C. Dion, F. Abraham, M. Saadi, *J. Solid. State. Chem.* 1999, **146**, 258-265.
20. J. Yeon, A. S. Sefat, T. T. Tran, P. S. Halasyamani, H. C. zur Loye, *Inorg. chem.* 2013, **52**, 6179-6186.
21. Y. Wang, J. Liang, T. Wen, K. Li, Y. Wang, G. Li, F. Liao, J. Lin, *Solid. State. Chem.* 2012, **192**, 1-6.
22. K. Waltersson, B. Forslund, *Acta. Crystallogr. B.* 1977, **33**, 775-779.
23. V. G. Zubkov, A. P. Tyutyunnik, I. F. Berger, L. L. Surat, N. V. Tarakina, B. V. Slobodin, V. G. Bamburov, *Dokl. Akad. Nauk.* 2008, **421**, 506-510.
24. R. Gopal, C. Calvo, *Can. J. of Chem.* 1973, **51**, 1004-1009.
25. Y. Matsushima, A. Sato, M. Kitaura, H. Kominami, K. Hara, *J. Ceram. Soc. Jpn.* 2019, **127**, 627-635.
26. N. Guskos, A. Bezkrvnyi, J. Typek, N. Yu. Ryabova, A. Blonska-Tabero, M. Kurzawa, M. Maryniak, *J. Alloy. Compd.* 2005, **391**, 20-25.



27. M. Schindler, F. C. Hawthorne, *J. Solid. State. Chem.* 1999, **146**, 271-276.
28. M. Waburg, H. Müller-Buschbaum, *Monatsh. Chem.* 1986, **117**, 131-138.
29. M. Von Postel, H. Müller-Buschbaum, *Z. Anorg. Allg. Chem.* 1992, **615**, 97-100.
30. H. Müller-Buschbaum, M. von Postel, *E Z. Anorg. Allg. Chem.* 1992, **615**, 101-103.
31. C. Müller, H. Müller-Buschbaum, *J. Alloy. Compd.* 1993, **191**, 251-253.
32. E. V. Murashova, Yu. A. V. K. Velikodnyi, *Zh. Neorg. Khim.* 1989, **34**, 1388-1392.
33. A. Nakatsuka, Y. Ikuta, A. Yoshiasa, K. Iishi, *Mater. Res. Bull.* 2004, **39**, 949-956.
34. A. Bhim, W. Zhang, P. S. Halasyamani, J. Gopalakrishnan, S. Natarajan, *Inorg. Chem.* 2019, **58**, 8560-8569.
35. N. E. Lamsakhar, M. H. Hadouchi, M. Zriouil, A. Assani, M. Saadi, A. Lahmar, M. El Marssi, L. El Ammari, *Inorg. Chem. Commun.* 2019, **107**, 107472.
36. A. P. Tyutyunnik, V. G. Zubkov, L. L. Surat, B. V. Slobodin, G. Svensson, *Powder. diff.* 2005, **20**, 189-192.
37. N. Wang, Z. He, M. Cui, W. Guo, S. Zhang, M. Yang, *Cryst. Growth Des.* 2015, **15**, 1619-1624.
38. H. Yu, J. Young, H. Wu, W. Zhang, J. M. Rondinelli, P. S. Halasyamani, *J. Am. Chem. Soc.* 2016, **138**, 4984-4989.
39. A. P. Malakho, O. L. Vorontsova, V. A. Morozov, S. Yu. Stefanovich, B. I. Lazoryak, *Zh. Neorg. Khim.* 2004, **49**, 165-173.
40. T. Hasegawa, Y. Abe, A. Koizumi, T. Ueda, K. Toda, M. Sato, *Inorg. Chem.* 2018, **57**, 857-866.
41. N. E. H. Lamsakhar, M. Zriouil, A. Assani, M. Saadi, L. El Ammari, *Acta. Crystallogr. E.* 2018, **74**, 1155-1158.
42. D. G. Chen, W. D. Cheng, D. S. Wu, H. Zhang, Y. C. Zhang, Y. J. Gong, Z. G. Kan, *Solid. State. Chem.* 2004, **177**, 3927-3933.
43. R. Madhuri, S. Ganesanpotti, *J. Am. Ceram. Soc.* 2020, **103**, 3157-3167.
44. M. Zheng, P. Lv, D. Chen, F. Yan, F. Huang, *J. Struc. Chem.* 2013, **32**, 106-112.
45. L. K. Bharat, K. G. Krishna, J. S. Yu, *J. Alloy. Compd.* 2017, **699**, 756-762.
46. X. Shan, S. Kim, A. M. Abeykoon, G. Kwon, D. Olds, X. Teng, *ACS. Appl. Mater. Interfaces.* 2020, **12**, 54627-54636.
47. A. Bhatia, J. Xu, J. P. Pereira-Ramos, G. Rouse, R. Baddour-Hadjean, *Chem. Mater.* 2021, **34**, 1203-1212.
48. X. Wang, D. Vander Griend, C. L. A. Stern, K. R. Poeppelmeier, *J. Alloy. Compd.* 2000, **298**, 119-124.
49. S. J. Hong, J. Li, M. A. Subramanian, *Acta. Crystallogr. E.* 2021, **77**, 588-591.
50. V. D. Zhuravlev, A. P. Tyutyunnik, A. Y. Chufarov, N. I. Lobachevskaya, A.

- A. Velikodnyi, *Powder. Diffr.* 2018, **33**, 216-224.
51. E. V. Murashova, Yu. A. Velikodnyi, V. K. Trunov, *Kristallografiya*. 1991, **36**, 617-621.
52. D. Capsoni, M. Bini, V. Massarotti, P. Mustarelli, F. Belotti, P. Galinetto, *J. Phy. Chem. B*. 2006, **110**, 5409-5415.
53. D. J. Lloyd, J. Galy, *Struct. Commun.* 1973, **2**, 209-211.
